# Supplementary material for: Highly efficient separation of 5-hydroxymethylfurfural from imidazolium-based ionic liquids
Source: Royal Society of Chemistry journal article supplement (doi:10.1039/d0gc03557b), 2020-12-10
Supplement: d0gc03557b1.pdf [file d0gc03557b1.pdf]

## **Highly efficient separation of 5-hydroxymethylfurfural from imidazolium-based ionic liquids**

Huiyong Wang, Jingjing Cui, Yuling Zhao, Zhiyong Li\*, Jianji Wang\*

*Henan Key Laboratory of Green Chemistry, Collaborative Innovation Center of Henan Province  
for Green Manufacturing of Fine Chemicals, Key Laboratory of Green Chemical Media and  
Reactions, Ministry of Education, School of Chemistry and Chemical Engineering, Henan Normal  
University, Xinxiang, Henan 453007, P. R. China*

\*Corresponding author: E-mail: [yli@htu.edu.cn](mailto:yli@htu.edu.cn) (Zhiyong Li)

E-mail: [jwang@htu.edu.cn](mailto:jwang@htu.edu.cn) (Jianji Wang)

Number of pages: 13

Number of figures: 21

## Table of Contents

|                                                                                                                                                              |     |
|--------------------------------------------------------------------------------------------------------------------------------------------------------------|-----|
| The effects of system temperature and initial concentration of 5-HMF on the extraction efficiency of 5-HMF from different ILs by using THF (Fig. S1-S2)..... | S3  |
| The extraction efficiency of 5-HMF from different ILs by different extracting solvents at 25 °C (Fig. S3-S4).....                                            | S4  |
| O–H stretching of 5-HMF in the mixtures of 5-HMF and extracting solvents as a function of mole fraction of the extracting solvents (Fig. S5-S10).....        | S5  |
| The effect of run number on the cumulative extraction efficiency of 5-HMF from different ILs by THF (Fig. S11-S15).....                                      | S8  |
| O–H stretching of 5-HMF in the mixtures of 5-HMF and ILs as a function of mole fraction of the ILs (Fig. S16-S19).....                                       | S10 |
| The effect of run number on the cumulative extraction efficiency of 5-HMF from [Hemim][BF <sub>4</sub> ] (Fig. S20).....                                     | S12 |
| The chemical structures of the ILs used in this work (Fig. S21).....                                                                                         | S13 |

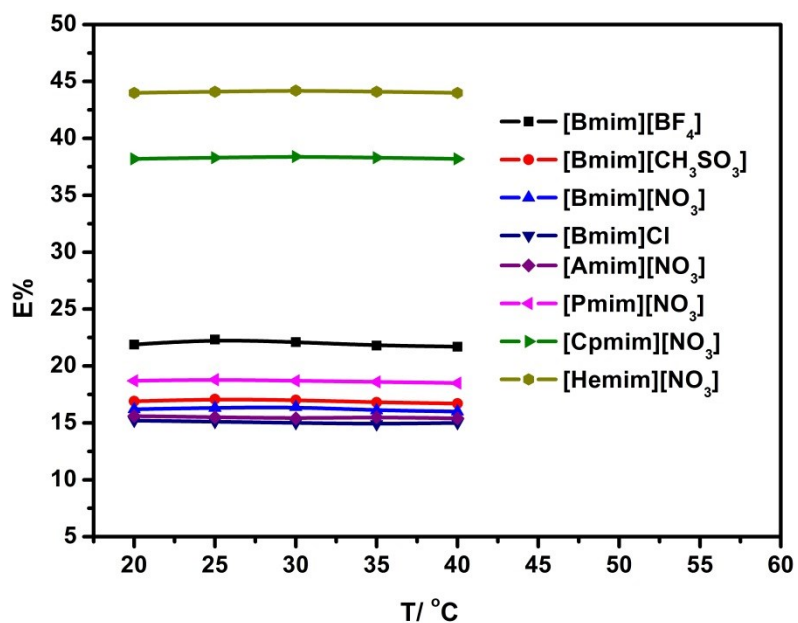

**Fig. S1** The effect of system temperature on the extraction efficiency of 5-HMF from different ILs by using THF.

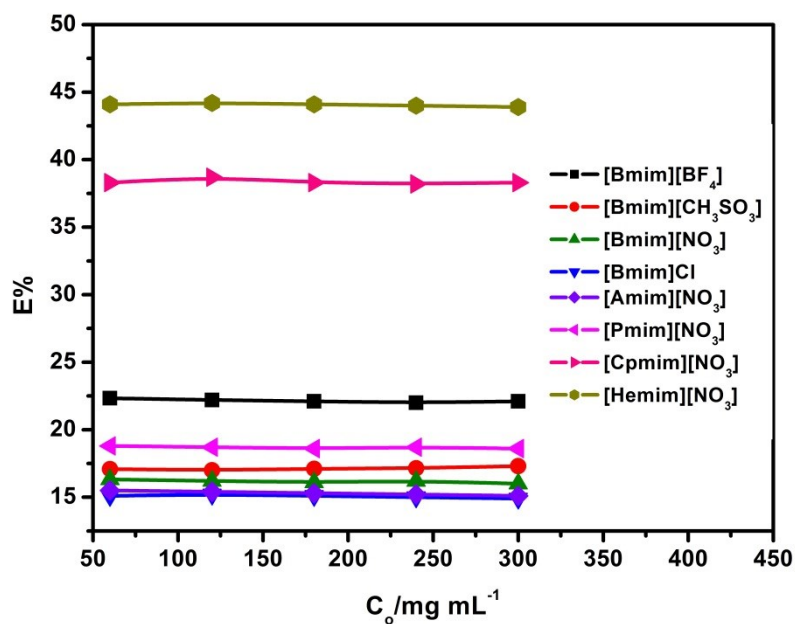

**Fig. S2** The effect of initial concentrations of 5-HMF in the ILs on the extraction efficiency of 5-HMF from different ILs by using THF.

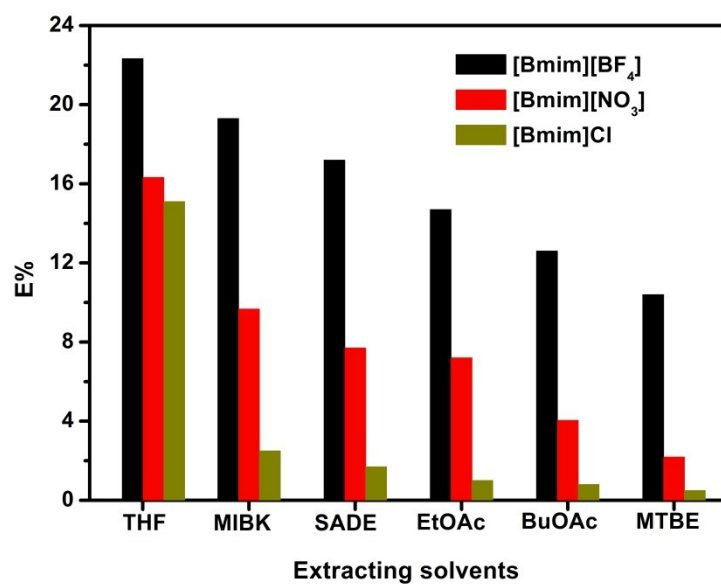

**Fig. S3** The extraction efficiency of 5-HMF from [Bmim]X (X=[BF<sub>4</sub>], [NO<sub>3</sub>] and Cl) by different extracting solvents at 25 °C.

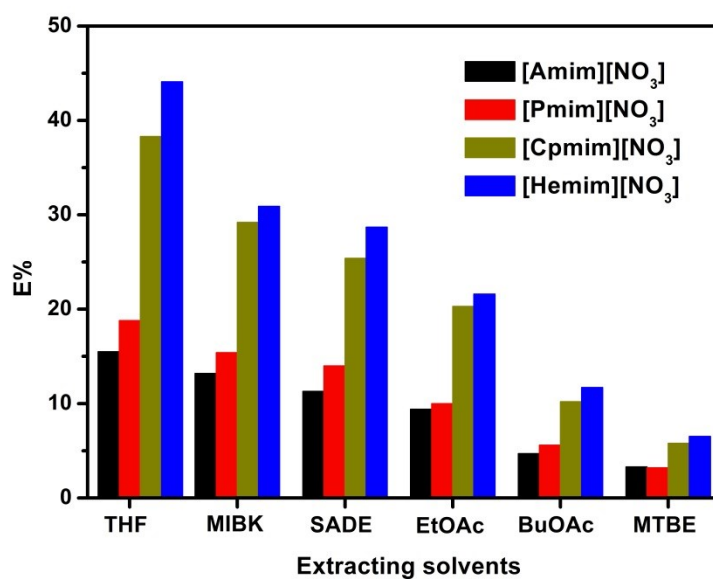

**Fig. S4** The extraction efficiency of 5-HMF from the [NO<sub>3</sub>]<sup>-</sup> anion based ILs with different cations by different extracting solvents at 25 °C.

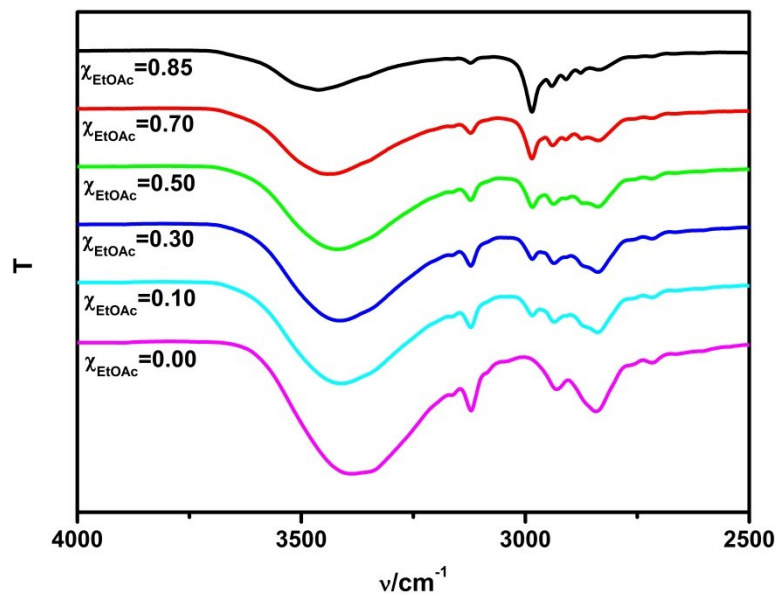

**Fig. S5** O–H stretching of 5-HMF in 5-HMF- EtOAc mixtures as a function of mole fraction of EtOAc.

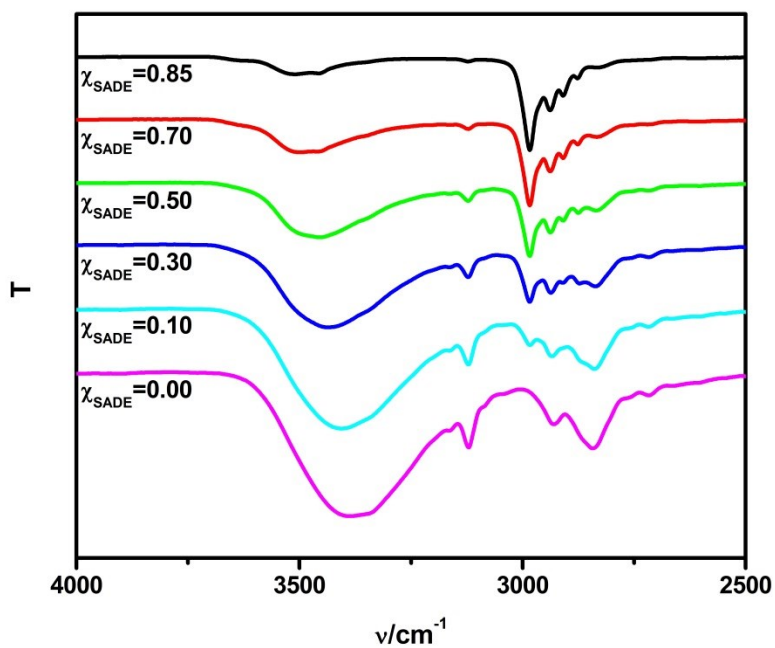

**Fig. S6** O–H stretching of 5-HMF in 5-HMF- SADE mixtures as a function of mole fraction of SADE.

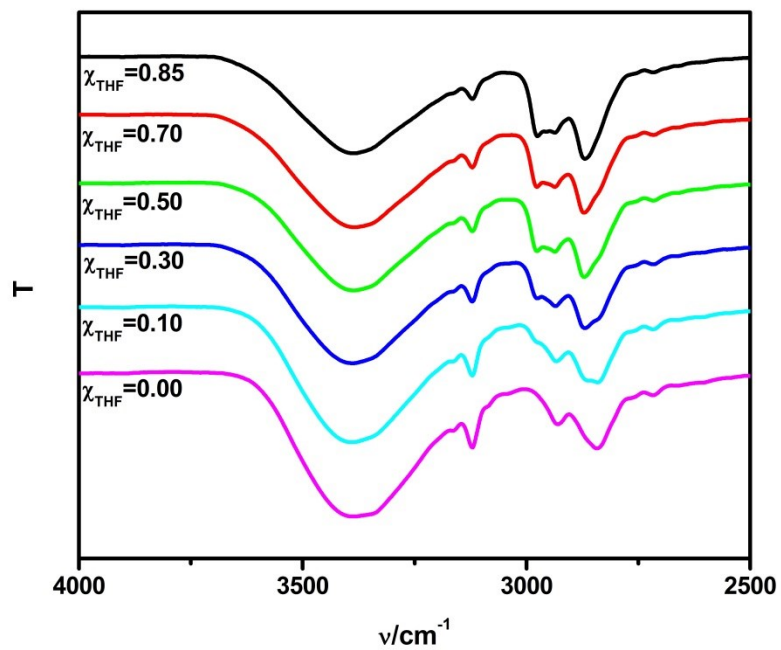

**Fig. S7** O–H stretching of 5-HMF in 5-HMF- THF mixtures as a function of mole fraction of THF.

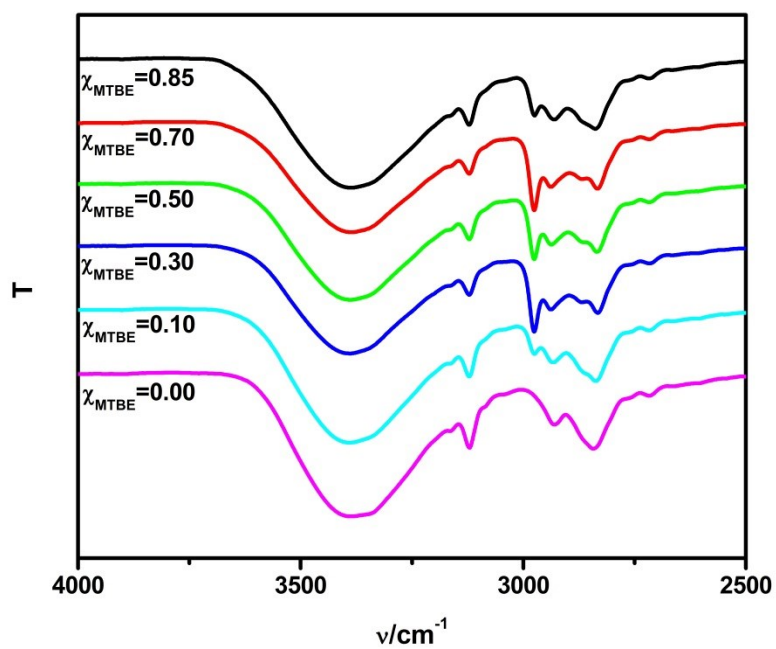

**Fig. S8** O–H stretching of 5-HMF in 5-HMF- MTBE mixtures as a function of mole fraction of MTBE.

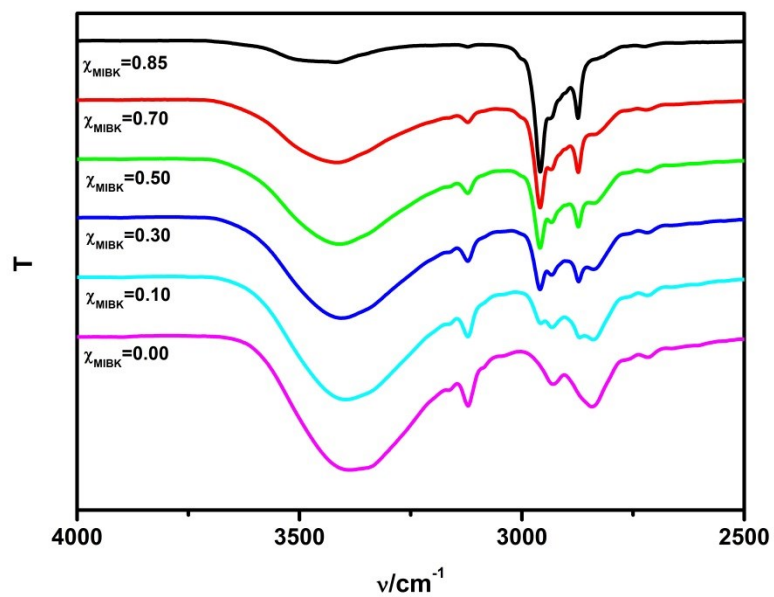

**Fig. S9** O–H stretching of 5-HMF in 5-HMF- MIBK mixtures as a function of mole fraction of MIBK.

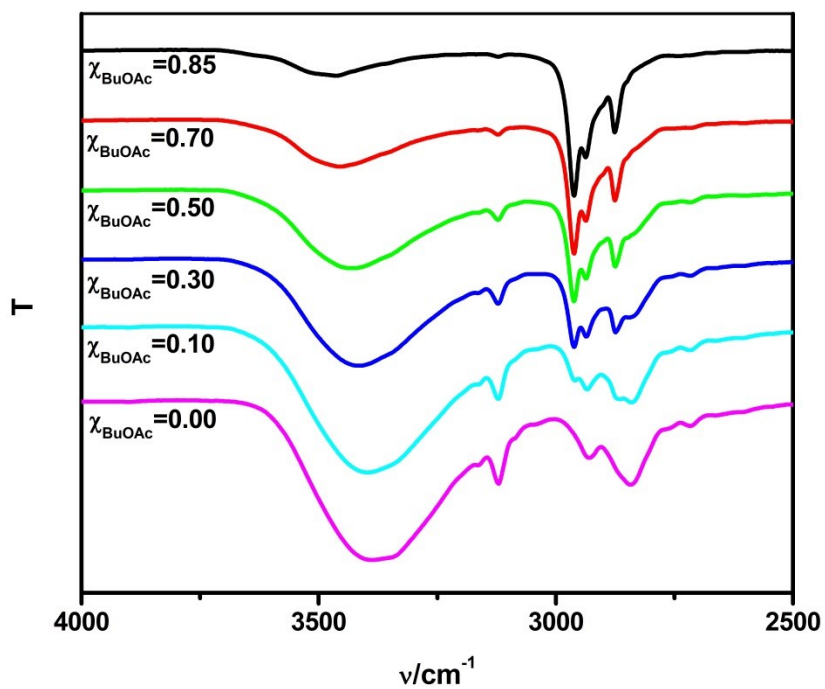

**Fig. S10** O–H stretching of 5-HMF in 5-HMF- BuOAc mixtures as a function of mole fraction of BuOAc.

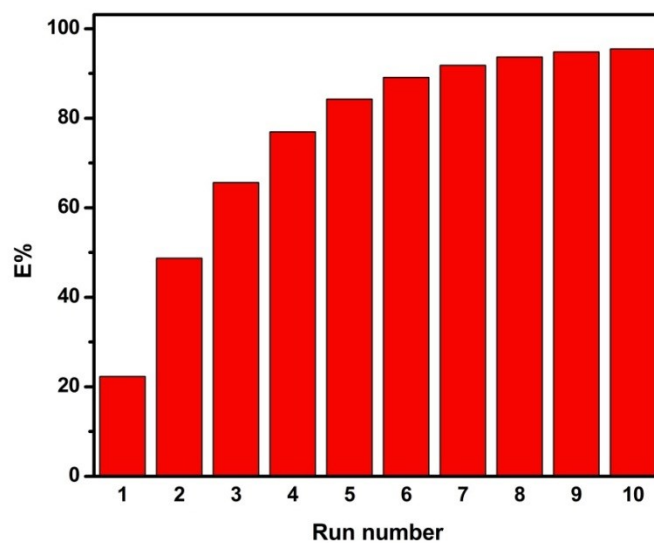

**Fig. S11** The effect of run number on the cumulative extraction efficiency of 5-HMF in [Bmim][BF<sub>4</sub>] by THF

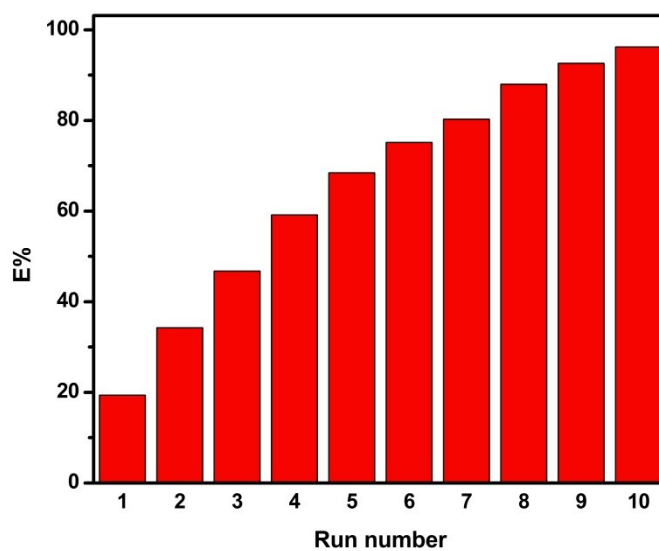

**Fig. S12** The effect of run number on the cumulative extraction efficiency of 5-HMF in [Bmim][CH<sub>3</sub>SO<sub>3</sub>] by THF



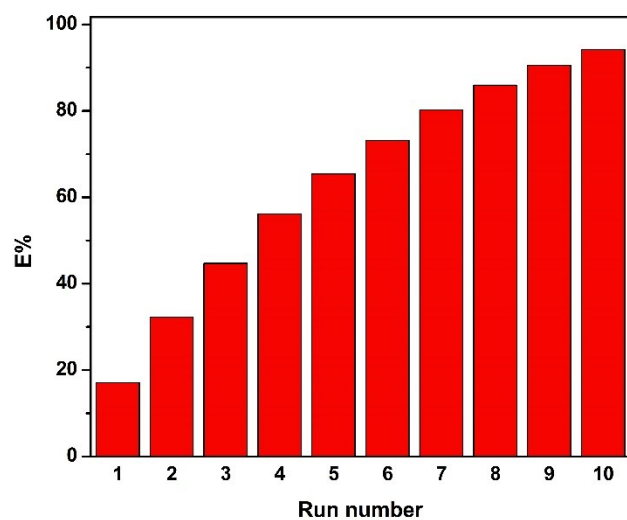

**Fig. S13** The effect of run number on the cumulative extraction efficiency of 5-HMF in [Bmim][CH<sub>3</sub>OSO<sub>3</sub>] by THF

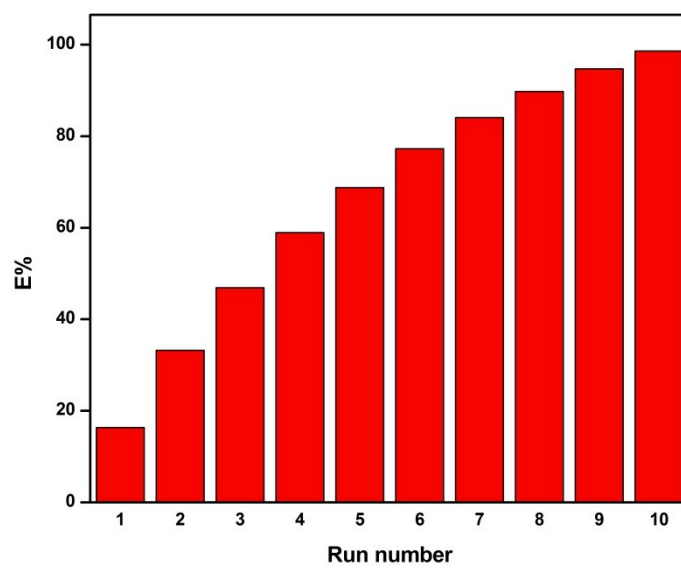

**Fig. S14** The effect of run number on the cumulative extraction efficiency of 5-HMF in [Bmim][NO<sub>3</sub>] by THF

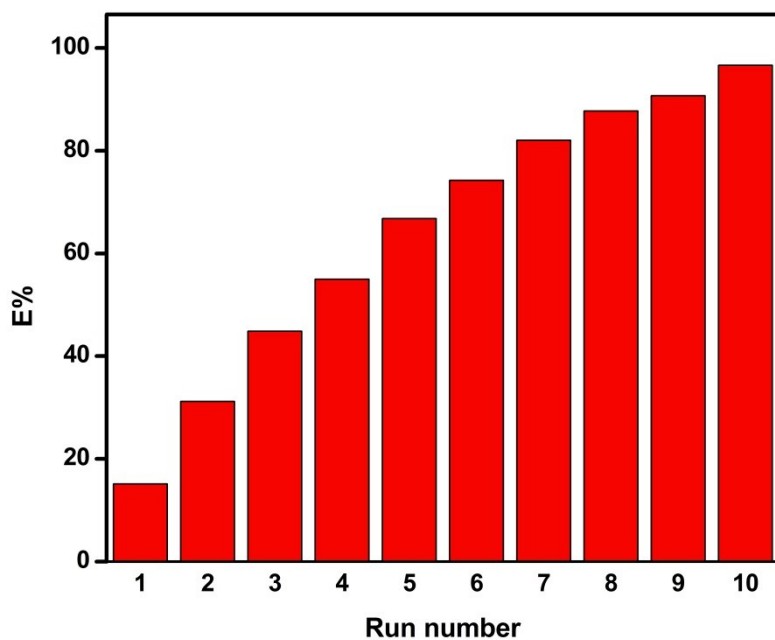

**Fig. S15** The effect of run number on the cumulative extraction efficiency of 5-HMF in [Bmim]Cl by THF

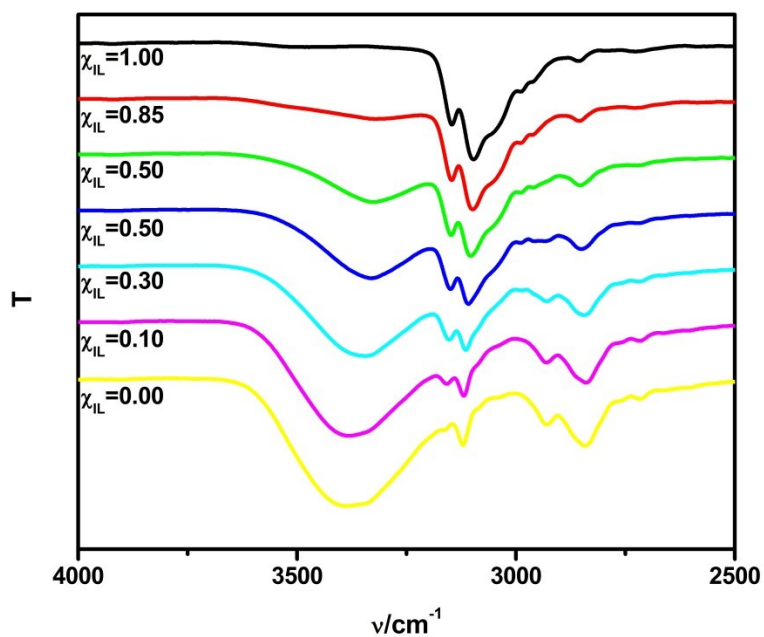

**Fig. S16** O–H stretching of 5-HMF in 5-HMF- [Amim][NO<sub>3</sub>] mixtures as a function of mole fraction of [Amim][NO<sub>3</sub>].

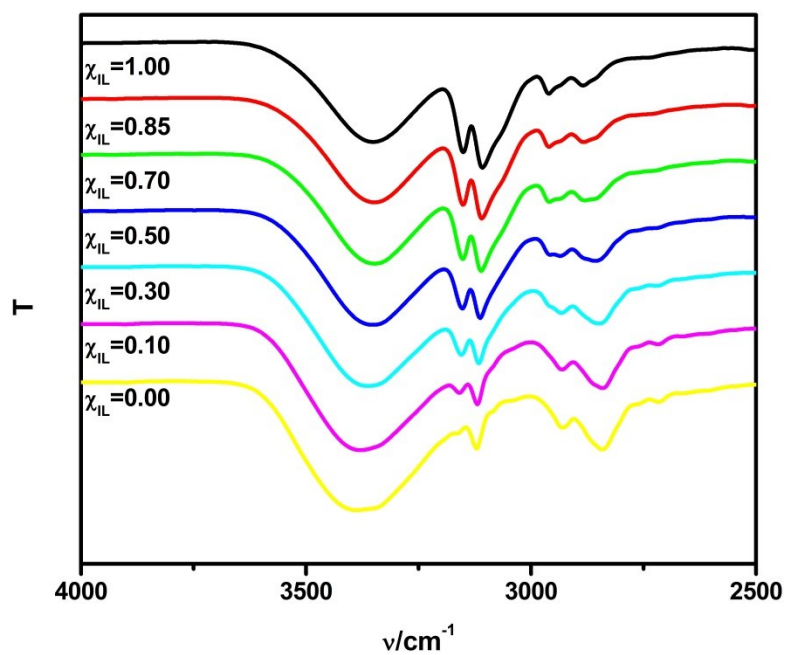

**Fig. S17** O–H stretching of 5-HMF in 5-HMF- [Hemim][NO<sub>3</sub>] mixtures as a function of mole fraction of [Hemim][NO<sub>3</sub>].

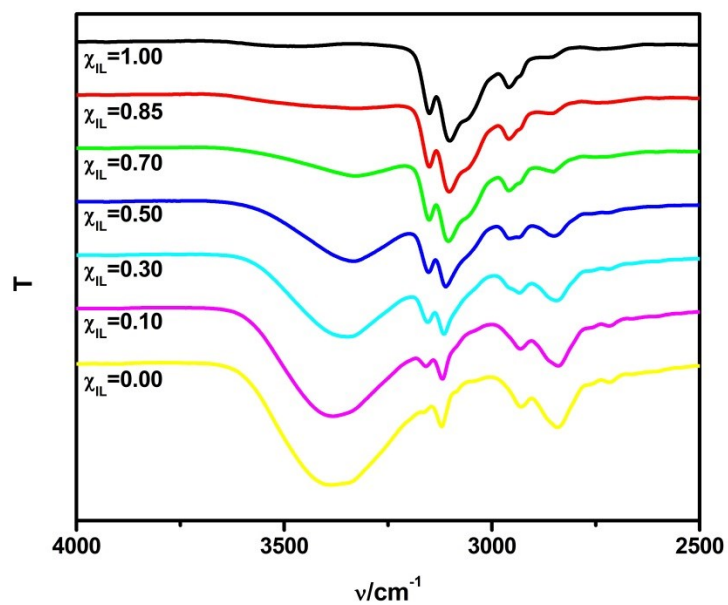

**Fig. S18** O–H stretching of 5-HMF in 5-HMF-[Cpmim][NO<sub>3</sub>] mixtures as a function of mole fraction of [Cpmim][NO<sub>3</sub>].

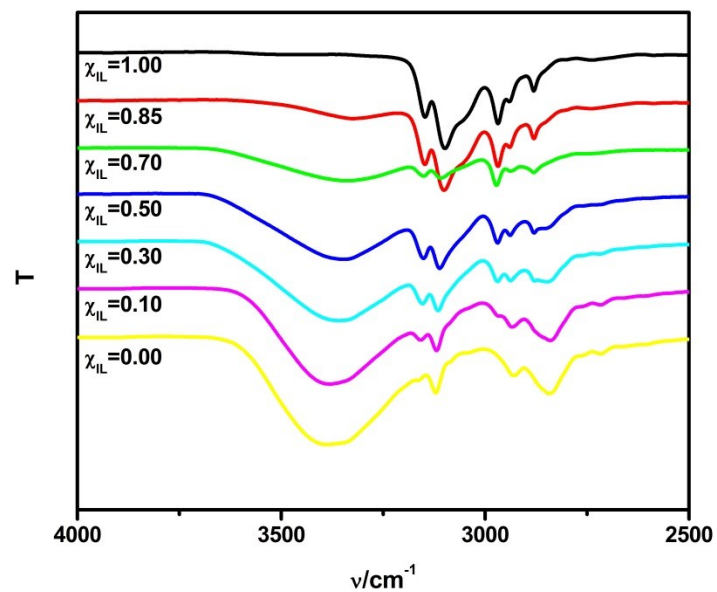

**Fig. S19** O–H stretching of 5-HMF in 5-HMF-[Pmim][NO<sub>3</sub>] mixtures as a function of mole fraction of [Pmim][NO<sub>3</sub>].

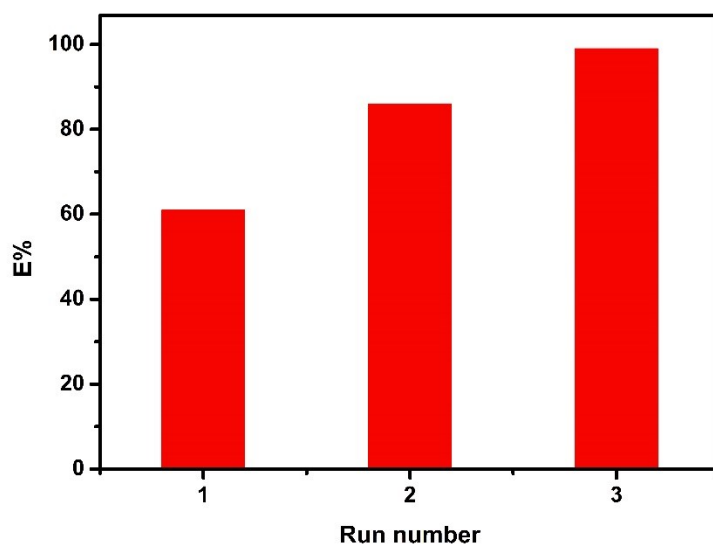

**Fig. S20** The effect of run number on the cumulative extraction efficiency of 5-HMF from [Hemim][BF<sub>4</sub>].

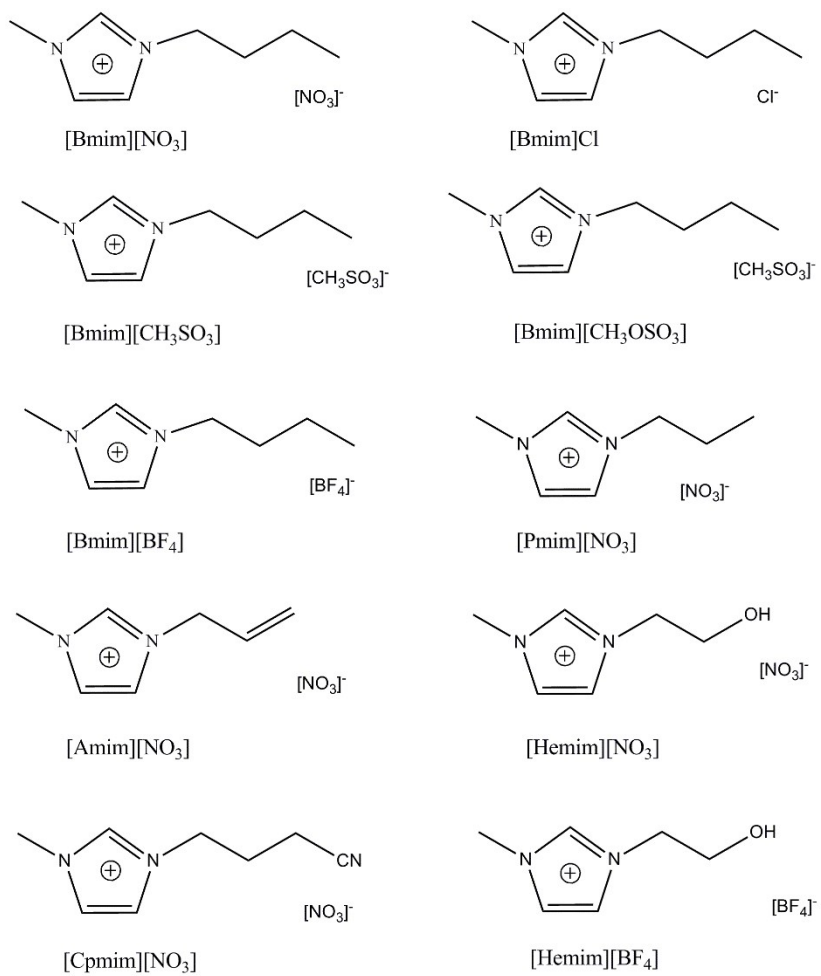

**Fig. S21** The chemical structures of the ILs used in this work.
